1 **A T7 phage factor required for managing RpoS in *Escherichia coli***

2

3 Aline Tabib-Salazar<sup>2, a</sup>, Bing Liu<sup>1, a</sup>, Declan Barker<sup>2</sup>, Lynn Burchell<sup>2</sup>, Udi Qimron<sup>3</sup>,

4 Steve J. Matthews<sup>2, \*</sup> and Sivaramesh Wigneshweraraj<sup>2, \*</sup>

5

6 <sup>1</sup>BioBank, First Affiliated Hospital, School of medicine, Xi'an Jiaotong University,

7 Shaanxi Sheng, China; <sup>2</sup>MRC Centre for Molecular Bacteriology and Infection,

8 Imperial College London, London, SW7 2AZ, UK; <sup>3</sup>Department of Clinical

9 Microbiology and Immunology, Sackler School of Medicine, Tel Aviv University,

10 Tel Aviv 69978, Israel.

11

12 **Corresponding authors:** Sivaramesh Wigneshweraraj or Steve Matthews, MRC

13 Centre for Molecular Bacteriology and Infection, Imperial College London, London,

14 SW7 2AZ, UK. E-mail: [s.r.wig@imperial.ac.uk](mailto:s.r.wig@imperial.ac.uk) or [s.j.matthews@imperial.ac.uk](mailto:s.j.matthews@imperial.ac.uk)

15

16 **Author contributions:** A.T-S., B.L., S.W. and S.M. designed research; A.T-S., B.L.,

17 L.B., and D.B. performed research; S.W., S.M., A.T-S., B.L., and U.Q. analyzed data

18 and S.W., S.M., A.T-S and B.L. wrote the paper.

19

20 <sup>a</sup>A.T-S and B.L. contributed equally to this work.

21

22 **Keywords:** *Escherichia coli*; RNA polymerase; T7 phage; Transcription regulation;

23 Stationary phase

24

25 **T7 development in *Escherichia coli* requires the inhibition of the housekeeping**  
26 **form of the bacterial RNA polymerase (RNAP),  $E\sigma^{70}$ , by two T7 proteins: Gp2**  
27 **and Gp5.7. While the biological role of Gp2 is well understood, that of Gp5.7**  
28 **remains to be fully deciphered. Here, we present results from functional and**  
29 **structural analyses to reveal that Gp5.7 primarily serves to inhibit  $E\sigma^S$ , the**  
30 **predominant form of the RNAP in the stationary phase of growth, which**  
31 **accumulates in exponentially growing *E. coli* as a consequence of buildup of**  
32 **guanosine pentaphosphate ((p)ppGpp) during T7 development. We further**  
33 **demonstrate a requirement of Gp5.7 for T7 development in *E. coli* cells in the**  
34 **stationary phase of growth. Our finding represents a paradigm for how some**  
35 **lytic phages have evolved distinct mechanisms to inhibit the bacterial**  
36 **transcription machinery to facilitate phage development in bacteria in the**  
37 **exponential and stationary phases of growth.**

38

### 39 **Significance statement**

40 Virus that infect bacteria (phages) represent the most abundant living entities on the  
41 planet and many aspects of our fundamental knowledge of phage-bacteria  
42 relationships have been derived in the context of exponentially growing bacteria. In  
43 the case of the prototypical *Escherichia coli* phage T7, specific inhibition of the  
44 housekeeping form of the RNA polymerase ( $E\sigma^{70}$ ) by a T7 protein, called Gp2, is  
45 essential for the development of viral progeny. We now reveal that T7 uses a second  
46 specific inhibitor that selectively inhibits the stationary phase RNAP ( $E\sigma^S$ ), which  
47 enables T7 to develop well in exponentially growing and stationary phase bacteria.  
48 The results have broad implications for our understanding of phage-bacteria  
49 relationships and therapeutic application of phages.

50 /body

51 Viruses of bacteria, phages, have evolved diverse and sophisticated mechanisms to  
52 takeover essential host processes to facilitate the successful development of phage  
53 progeny. Many such host takeover mechanisms involve small proteins that interact  
54 with and repurpose, inhibit or modulate the activity of essential bacterial enzymes,  
55 which as a consequence, often result in the demise of the bacterial cell (1). Thus, a  
56 detailed understanding of phage-encoded antibacterial small proteins and their  
57 bacterial targets at a molecular level will not only unravel new phage biology, but  
58 may also inform and inspire the discovery of novel antibacterial targets and  
59 antibacterial compounds. Unsurprisingly, the acquisition of the bacterial transcription  
60 machinery, the RNA polymerase (RNAP), is a major mechanism by which phages  
61 reprogram bacterial cellular processes in order to mount a successful infection (2, 3).  
62 The prototypical lytic phage of *Escherichia coli*, T7, synthesizes three proteins,  
63 Gp0.7, Gp2 and Gp5.7, that interact with host RNAP, to facilitate the temporal  
64 coordinated expression of its genome. The genes of T7 are categorized as early,  
65 middle and late to reflect the timing of their expression during the infection process.  
66 Early and middle genes generally encode proteins required for phage RNA synthesis,  
67 DNA replication and host takeover, whereas the late genes specify T7 virion assembly  
68 and structural proteins. The translocation of the T7 genome into *E. coli* is a  
69 transcription-coupled process and requires the housekeeping form of the host RNAP  
70 ( $E\sigma^{70}$ ) to transcribe the early genes from three strong early gene promoters, T7 A1,  
71 A2 and A3, and catalyze the entry of T7 DNA into the cell (4). The coordinated  
72 action of the early gene product Gp0.7 and the essential middle gene product Gp2  
73 subsequently shuts off  $E\sigma^{70}$  activity on the T7 genome. The viral single-subunit  
74 RNAP (T7 RNAP, Gp1, a product of an early gene) transcribes the middle and late

75 viral genes. The shutting down of host RNAP is crucial for the coordination of the  
76 activities of bacterial and phage RNAPs on the phage genome and thus consequently  
77 for successful completion of the infection cycle: Gp0.7 is a protein kinase that  
78 phosphorylates  $E\sigma^{70}$ , leading to increased transcription termination at sites located  
79 between the early and middle genes on the T7 genome (5, 6); Gp2 binds in the main  
80 DNA binding channel of  $E\sigma^{70}$  and thereby prevents the formation of the  
81 transcriptionally-proficient open promoter complex ( $RP_O$ ) at the T7 A1-3 promoters  
82 (7). Gp2 is indispensable for T7 growth. In a T7  $\Delta gp2$  phage, aberrant transcription of  
83 middle and late T7 genes (that are normally transcribed by the T7 RNAP) by  $E\sigma^{70}$   
84 results in interference between the two RNAPs and, consequently, in aborted infection  
85 (5). Recently, a T7 middle gene product, Gp5.7, was identified as a repressor of  $RP_O$   
86 formation specifically on the T7 A1-3 promoters by  $E\sigma^{70}$  molecules, which might  
87 have escaped inhibition by Gp2 (8). However, since phage genomes tend to be  
88 compact and efficient, it is puzzling that T7 has evolved two markedly different  
89 proteins to inhibit  $E\sigma^{70}$ , especially since Gp5.7, unlike Gp2, is a relatively poor  
90 inhibitor of  $E\sigma^{70}$  (8). In this study, we unveil additional biological roles for Gp5.7  
91 during T7 development in *E. coli*.

92

93

94

95

96

97

98

99

100 **Results.**

101

102 **Gp5.7 is an inhibitor of the *E. coli* stationary phase RNAP,  $E\sigma^S$**

103 Previously, we posited that Gp5.7 prevents transcription initiation from T7 A1-A3  
104 promoters by  $E\sigma^{70}$  that might have escaped inhibition by Gp2 (8). While this still  
105 remains a role for Gp5.7 in T7 development in *E. coli*, we noted a report by Friesen  
106 and Fill describing the accumulation of the stress signaling nucleotide guanosine  
107 pentaphosphate, (p)ppGpp, in a valine auxotroph strain of *E. coli* during T7  
108 development (9). Since (p)ppGpp simultaneously induces  $\sigma^S$  transcription and  
109 accumulation of  $\sigma^S$  (the predominant  $\sigma$  factor active in stationary phase *E. coli*) and,  
110 considering that Gp5.7 is an inefficient inhibitor of  $E\sigma^{70}$  compared to Gp2 (8), we  
111 contemplated whether Gp5.7 might preferentially inhibit  $E\sigma^S$  over  $E\sigma^{70}$ . Initially, we  
112 established that (p)ppGpp does indeed accumulate during T7 development in  
113 exponentially growing wild-type *E. coli* cells (Fig. 1A). We further demonstrated that  
114 the accumulation of (p)ppGpp is accompanied by an increase in the intracellular  
115 levels of  $\sigma^S$  during T7 development in exponentially growing *E. coli* (Fig. 1B).  
116 Control experiments with a *relA/spoT* mutant *E. coli* strain confirmed that the  
117 accumulation of  $\sigma^S$  during T7 infection was indeed (p)ppGpp-dependent (Fig. 1B).

118 Next, we tested whether  $E\sigma^S$  could initiate transcription from the T7 A1  
119 promoter as efficiently as  $E\sigma^{70}$ . To do this, we conducted an *in vitro* transcription  
120 assay using a 65-bp DNA fragment containing the T7 A1 promoter sequence as the  
121 template. Under the conditions used here, this assay reports the ability of  $E\sigma^{70}$  or  $E\sigma^S$   
122 to bind to the promoter, initiate DNA strand separation, and synthesize a trinucleotide  
123 RNA transcript, CpApU, which is complementary to the first three nucleotides (+1 to  
124 +3) of the sequence of the template strand of the T7 A1 promoter. The results shown

125 in Fig. 1C revealed that  $E\sigma^S$  could initiate transcription from the T7 A1 promoter as  
126 efficiently as  $E\sigma^{70}$  (Fig. 1C, compare lanes 1 and 8). Consistent with previous results  
127 (7, 10), Gp2 inhibited  $E\sigma^{70}$  activity by >80% when present at a molar ratio of 1:1 with  
128 respect to  $E\sigma^{70}$ ; in contrast, Gp2 inhibited  $E\sigma^S$  by only 40% when present at a molar  
129 ratio of 1:1 with respect to  $E\sigma^S$  (Fig. 1C, compare lanes 2 and 9). However, as  
130 previously shown (8), ~16-fold more Gp5.7 than Gp2 was required to obtain a ~60%  
131 inhibition of  $E\sigma^{70}$  (Fig. 1C, compare lanes 2 and 5). Strikingly, with the same  
132 concentration of Gp5.7, we observed >90% inhibition of  $E\sigma^S$  activity (Fig. 1C, lane  
133 12). Control experiments with a functionally defective mutant of Gp5.7 (Gp5.7-L42A  
134 (8)) confirmed that the inhibition of  $E\sigma^S$  activity on the T7 A1 promoter by Gp5.7 was  
135 specific (Fig. S1). It thus seems that Gp5.7 is a more efficient inhibitor of  $E\sigma^S$  than of  
136  $E\sigma^{70}$  (Fig. 1C). In contrast and consistent with previous observations (7), Gp2 is a  
137 more effective inhibitor of  $E\sigma^{70}$  than  $E\sigma^S$  (Fig. 1C). Overall, we conclude that Gp5.7  
138 and Gp2 are both required to fully shutdown the  $E\sigma^{70}$  and  $E\sigma^S$  to allow optimal T7  
139 development in *E. coli* cells during the exponential phase of growth.

140

#### 141 **Gp5.7 interacts with region 4 of $\sigma^S$**

142 Although Gp5.7 interacts with the core subunits of the RNAP (8), our results indicate  
143 that  $\sigma^S$  would likely constitute a major interacting site of Gp5.7. Therefore, we next  
144 focused on identifying the Gp5.7 interacting site on  $\sigma^S$ . Nickel affinity pull-down  
145 experiments with hexa-histidine tagged  $\sigma^S$  (6xHis- $\sigma^S$ ) and untagged Gp5.7 were  
146 conducted. As shown in Fig. 2A, incubation of 6xHis- $\sigma^S$  (lane 2) with whole *E. coli*  
147 cell extracts in which untagged Gp5.7 is overexpressed from a plasmid (lane 3) led to  
148 the co-purification of untagged Gp5.7 with 6xHis- $\sigma^S$  (lane 5). Control experiments  
149 with *E. coli* whole cell extracts with an empty plasmid (Fig. 2A, lanes 4 and 6)

150 confirmed that Gp5.7 interacts specifically with 6xHis- $\sigma^S$  and co-purifies with it.  
151 Since we showed previously that Gp5.7 interacts with promoter DNA proximal to or  
152 overlapping the consensus -35 motif of the T7 A1 promoter (8), which is also bound  
153 by the conserved region 4 (R4) domain of  $\sigma$  factors, we considered whether R4  
154 domain of  $\sigma^S$  could be a binding site for Gp5.7. To test this, we conducted affinity  
155 pull-down experiments as in Fig. 2A using a hexa-histidine tagged version of the R4  
156 domain (amino acid residues 245-330) of  $\sigma^S$  (6xHis- $\sigma^S$ R4). As shown in Fig. 2B (lane  
157 5), we detected untagged Gp5.7 co-purifying with the 6xHis- $\sigma^S$ R4 domain. In the  
158 converse experiment, we repeated affinity pull-down experiments as in Fig. 2A using  
159 FLAG epitope tagged  $\sigma^S$  lacking the R4 domain (FLAG- $\sigma^S\Delta$ R4). As indicated in Fig.  
160 2C, and as expected, we failed to detect untagged Gp5.7 co-purifying with the FLAG-  
161  $\sigma^S\Delta$ R4 protein (lane 5). Based on the affinity pull-down experiments shown in Fig.  
162 2A-C, we conclude that the R4 domain of  $\sigma^S$  constitutes the binding site for Gp5.7.

163

#### 164 **Structural insights into the interaction between R4 domain of $\sigma^S$ and Gp5.7**

165 To independently verify that R4 domain of  $\sigma^S$  constitutes the binding site for Gp5.7  
166 within E $\sigma^S$  and to map the Gp5.7 interface within R4 of  $\sigma^S$ , we solved the solution  
167 structure of the isolated 6xHis- $\sigma^S$ R4 domain by NMR spectroscopy (Fig. 2D and  
168 Table S1). The structure demonstrates that the R4 domain of  $\sigma^S$  (hereafter referred to  
169 as the apo-R4 domain) is able to fold as an isolated subdomain, consisting of five  $\alpha$   
170 helices (H1-H5). The  $\alpha$  helices H1-H5 superpose well with the equivalent region from  
171 the crystal structure of E $\sigma^S$  transcription initiation complex, in which the R4 domain  
172 (hereafter referred to as the bound-R4 domain) is connected to RNAP subunits via a  
173 long and flexible linker (11). Interestingly, the apo-R4 domain exhibits some  
174 conformational differences in the carboxyl (C) and amino (N) termini compared to the

175 bound-R4 domain (Fig. 2E). The N-terminus of the apo-R4 domain, which in the  
176 bound-R4 domain is connected to  $E\sigma^S$  via a flexible linker, appears more disordered.  
177 The C-terminus of the apo-R4 domain contacts the core of the structure making the  
178 apo-R4 domain more compact and stable in the absence of the remaining  $\sigma^S$  domains,  
179 RNAP subunits or promoter DNA. We next recorded the 2D  $^1\text{H}$ - $^{15}\text{N}$  HSQC NMR  
180 spectra to monitor the backbone amide chemical shift and line-width perturbations for  
181  $^{15}\text{N}$ -labelled apo-R4 domain in the presence of up to a 2-fold molar excess of  
182 unlabelled Gp5.7. As shown in Fig. 2F, several peaks exhibited measurable  
183 broadening effects and the extent of broadening correlating with the amount of Gp5.7  
184 added (Fig. 2F). The Gp5.7 interaction surface was mapped on the structure of the  
185 apo-R4 domain (Fig. 2G), revealing that the main interacting residues localise to the  
186 C terminal part of H1 and N terminal part of H2. This analysis suggests that Gp5.7  
187 binds between the RNAP facing surface and the promoter-facing surface of R4 of  $\sigma^S$   
188 (notably H3 of 4.2 sub-region of R4; Fig. 2D). Overall, the results from the affinity  
189 pull-down and structural analyses unambiguously indicate that the R4 of  $\sigma^S$   
190 constitutes the binding site for Gp5.7 on  $\sigma^S$ .

191

### 192 **Gp5.7 inhibits $\text{RP}_O$ formation by $E\sigma^S$ on the T7 A1 promoter**

193 The location of the Gp5.7 binding surface on  $\sigma^S$  implies that Gp5.7 has evolved to  
194 target a  $\sigma^S$  domain potentially important for transcription initiation from the T7 A1  
195 promoter. Previous reports from several groups have implied that the interaction  
196 between R4 of  $\sigma^{70}$  and the consensus -35 promoter region is required for the  
197 stabilization of early intermediate promoter complexes *en route* to the  $\text{RP}_O$  at the T7  
198 A1 promoter (12-15). Therefore, we considered whether Gp5.7 inhibits  $E\sigma^S$ -  
199 dependent transcription from the T7 A1 promoter by antagonizing  $\text{RP}_O$  formation. In



200 agreement with this view, whereas  $E\sigma^S$  reconstituted with  $\sigma^S\Delta R4$  was able to initiate  
201 transcription from a prototypical  $E\sigma^{70}$ -dependent promoter i.e. *lacUV5* (albeit at a  
202 lower efficiency compared to reactions with wild-type  $E\sigma^S$ ), we failed to detect any  
203 transcription by  $E\sigma^S\Delta R4$  from the T7 A1 promoter (Fig. 3A). We then conducted  
204 electrophoretic gel mobility shift assays at 4°C (to detect initial RNAP-promoter  
205 complex formation) and at 37°C (to detect RPO formation) with  $E\sigma^S\Delta R4$  and a  $\gamma$ - $^{32}\text{P}$ -  
206 labelled T7 A1 probe to determine whether  $E\sigma^S\Delta R4$  was able to interact with the T7  
207 A1 promoter to form the initial promoter complex or whether the initial promoter  
208 complex formed by  $E\sigma^S\Delta R4$  on the T7 A1 promoter was unable to isomerize into the  
209 RPO, respectively. Results shown in Fig. 3B, demonstrated that although  $E\sigma^S$  and  
210  $E\sigma^S\Delta R4$  formed the initial promoter complex on the T7 A1 promoter equally well  
211 (lanes 2-3 and lanes 5-6), those formed by  $E\sigma^S\Delta R4$  seem unable to isomerize to form  
212 the transcriptionally proficient RPO (lanes 8-9 and lanes 11-12). Consistent with this  
213 conclusion, *in vitro* transcription assays with a T7 A1 promoter probe containing an  
214 heteroduplex segment between positions -12 and +2 (to mimic the RPO) revealed that  
215  $E\sigma^S\Delta R4$  is able to synthesize the CpApU transcript (Fig. 3C, compare lanes 1 and 2  
216 with lanes 3 and 4). In further support of the view that Gp5.7 inhibits RPO formation  
217 at the T7 A1 promoter,  $E\sigma^S$  was able to synthesize the CpApU transcript in the  
218 presence of Gp5.7 when the latter was added to a pre-formed RPO (i.e. when Gp5.7  
219 was added to the reaction following pre-incubation of  $E\sigma^S$  and the homoduplex T7 A1  
220 promoter at 37°C) (Fig. 3D). To better understand how Gp5.7 inhibits RPO formation  
221 at the T7 A1 promoter, we used the 2D  $^1\text{H}$ - $^{15}\text{N}$  HSQC NMR data of the interaction  
222 between Gp5.7 and R4 of  $\sigma^S$  (Fig. 2F and 2G), the solution structure of Gp5.7 (8) and  
223 the X-ray crystal structures of  $E\sigma^S$ -transcription initiation complex (TIC) (in which  
224 the interaction between R4 of  $\sigma^S$  and the consensus -35 promoter region is absent;

225 (11)) and the *E. coli*  $E\sigma^{70}$  TIC (in which the interaction between the consensus -35  
226 promoter region and the R4 of  $\sigma^{70}$  is present; (16)) to construct a model of Gp5.7  
227 bound  $E\sigma^S$  TIC using HADDOCK (17). This model, shown in Fig. S2, suggests that  
228 Gp5.7 binds to  $E\sigma^S$  in such an orientation that the positively charged side chains of  
229 amino acid residues R24 and R47 face the DNA region immediately adjacent to the  
230 consensus -35 motif of the T7 A1 promoter. Since efficient  $RP_O$  formation at the T7  
231 A1 promoter depends on the interaction between R4 of  $\sigma^{70}$  (12-15) and  $\sigma^S$  (Fig. 3A  
232 and 3B) and the consensus -35 promoter region, we envisage a scenario where the  
233 interaction of Gp5.7 with this region of the T7 A1 promoter antagonizes the  
234 interactions between R4 and the consensus -35 motif that are required for efficient  
235  $RP_O$  formation at this promoter. This view is also supported by our previous  
236 observation that apo Gp5.7 interacts, albeit weakly, with the region immediate  
237 upstream of the -35 motif of the T7 A1 promoter (8) and an alanine substitution at  
238 R24 (but not R47) render Gp5.7 inactive *in vivo* (8). Further, the model suggests that  
239 Gp5.7 is also proximal to core RNAP subunits (notably the  $\beta$  subunit), consistent with  
240 the finding that Gp5.7 can interact with the RNAP in the absence of any  $\sigma$  factors (8).  
241 Overall, we conclude that R4 of  $\sigma^S$  is important for  $RP_O$  formation at the T7 A1  
242 promoter and Gp5.7 inhibits  $RP_O$  formation by  $E\sigma^S$  during T7 development by  
243 interfering with the R4 of  $\sigma^S$ .

244

#### 245 **A role for Gp5.7 in managing $\sigma^S$ during T7 development in stationary phase *E.***

#### 246 ***coli***

247 The results so far indicate that  $E\sigma^S$  accumulates as a consequence of (p)ppGpp  
248 buildup during T7 development in exponentially growing *E. coli* cells and that Gp5.7  
249 is required to preferentially inhibit  $E\sigma^S$  activity on the T7 A1 promoter. However,

250 when *E. coli* cells are in the stationary phase of growth, the major species of RNAP  
251 molecules will contain  $\sigma^S$  (also due to the buildup of (p)ppGpp in response to the  
252 stresses encountered by *E. coli* cells in the stationary phase of growth; reviewed in  
253 (18)). In addition, (p)ppGpp, together with  $E\sigma^S$ , also contributes to the shutting-down  
254 of cellular activities in the stationary phase of growth. Therefore, the development of  
255 a phage can be affected by changes in the growth state, and thus cellular activities, of  
256 the bacterial cell. Consistent with this view, Nowicki et al (19) recently reported that  
257 progeny production by Shiga toxin converting lamboid phages was significantly more  
258 efficient in a  $\Delta relA/\Delta spoT$  *E. coli* (which is unable to synthesize (p)ppGpp) than in its  
259 isogenic wild-type strain.

260         A phage plaque is a clearing in a bacterial lawn and plaques form via an  
261 outward diffusion of phage progeny virions that prey on surrounding bacteria.  
262 Therefore, the rate of plaque-enlargement can serve as a proxy for how efficiently a  
263 phage develops and produces progeny within an infected bacterial cell. Further,  
264 although the aging of the bacterial lawn often represents a major barrier for plaque-  
265 enlargement, T7 plaques have been reported to enlarge continually on matured *E. coli*  
266 lawns (20), suggesting that T7 has evolved specific mechanisms to infect and develop  
267 in the stationary phase of *E. coli* growth. Therefore, we investigated whether Gp5.7 is  
268 required for T7 development in *E. coli* in the stationary phase of growth by measuring  
269 plaque size formed on a lawn of *E. coli* as a function of incubation time in the context  
270 of wild-type and  $\Delta relA/\Delta spoT$  *E. coli* strains (recall accumulation of  $\sigma^S$  will be  
271 compromised in the mutant strain due to the absence of (p)ppGpp; see above (18)). As  
272 shown in Fig. 4, the rate of plaque-enlargement and plaque size on a lawn of wild-  
273 type *E. coli* infected with T7 wild-type and  $\Delta gp5.7$  phage was indistinguishable for  
274 the first 12 hours (Fig. 4 and Movie S1). However, whereas T7 wild-type plaques

275 continued to enlarge, the rate at which the plaques formed by T7  $\Delta gp5.7$  enlarged  
276 significantly slowed after ~12 hours of incubation and completely ceased after ~20  
277 hours of incubation (Fig. 4 and Movie S1). Hence, after 72 hours of incubation, the  
278 size of the plaque formed by the T7  $\Delta gp5.7$  phage was ~50% smaller than the plaque  
279 formed by T7 wild-type phage on a lawn of wild-type *E. coli* cells. We were able to  
280 partially, yet specifically, revert the rate of plaque-enlargement and plaque size of the  
281 T7  $\Delta gp5.7$  phage to that of T7 wild-type phage by exogenously providing Gp5.7 from  
282 an inducible plasmid in *E. coli* (Fig. S3). The results overall imply that Gp5.7 is  
283 required for T7 development in *E. coli* in the stationary phase of growth. To  
284 independently verify this view, the relative efficiency of plaque formation (E.O.P) by  
285 the T7  $\Delta gp5.7$  phage on exponentially growing *E. coli* was compared with that on *E.*  
286 *coli* in the stationary phase of growth. Results shown in Fig. S4 indicated that the  
287 relative E.O.P by the T7  $\Delta gp5.7$  phage was almost 3 times lower than that of the wild-  
288 type phage (Fig. S4). This observation further underscores the view that T7  
289 development in *E. coli* in the stationary phase of growth is compromised in the  
290 absence of Gp5.7.

291 In marked contrast, although the rate of enlargement of the plaques formed by  
292 T7 wild-type phage was similar on a lawn of  $\Delta relA/\Delta spoT$  *E. coli* to that observed on  
293 a lawn of wild-type *E. coli* for the first 8 hours of incubation, the plaques formed by  
294 T7 wild-type phage continued to enlarge at a faster rate on a lawn of  $\Delta relA/\Delta spoT$  *E.*  
295 *coli* than on a lawn of wild-type *E. coli* lawn (Fig. 4). For example, after 48 hours of  
296 incubation, the size of the plaques formed by the T7 wild-type phage on a lawn of  
297  $\Delta relA/\Delta spoT$  *E. coli* was ~2-fold larger than those formed on a lawn of wild-type *E.*  
298 *coli* (Fig. 4) Strikingly, whereas the plaques formed by the T7  $\Delta gp5.7$  phage ceased  
299 enlarging after ~20 hours of incubation on a lawn of wild-type *E. coli*, they continued

300 to enlarge (albeit at a slower rate than that of T7 wild-type phage) on a lawn of  
301 *ΔrelA/ΔspoT E. coli* (Fig. 4). Overall, although we cannot fully exclude possibility  
302 that the absence of (p)ppGpp in *ΔrelA/ΔspoT E. coli* will generally provide a more  
303 favorable intracellular conditions for T7 development than in wild-type *E. coli* cells,  
304 the results clearly demonstrate that (i) the accumulation of (p)ppGpp during T7  
305 infection antagonizes T7 development in *E. coli*; (ii) Gp5.7 represents a mechanism  
306 by which T7 overcomes the antagonistic effect of (p)ppGpp-mediated accumulation  
307 of  $\sigma^S$  on its development and therefore (iii) Gp5.7 is also a T7 factor required for T7  
308 development in *E. coli* cells in the stationary phase of growth.

309

310

311

312

313

314

315

316

317

318

319

320

321

322

323

324

325 **Discussion.**

326

327 The inhibition of the host transcription machinery, the RNAP, is a central theme in  
328 the strategies used by phages to acquire their bacterial prey. In the prototypical *E. coli*  
329 phage T7, the switching from using the host RNAP for transcription of early T7 genes  
330 to the T7 RNAP for transcription of middle and late T7 genes is tightly regulated by  
331 two bacterial RNAP inhibitors: Gp2 and Gp5.7. Dysregulation of this process, for  
332 example due to the absence of any of these factors, is believed to lead to steric  
333 interference between the host and T7 RNAP molecules on the T7 genome and results  
334 in compromised or aborted development of phage progeny (5, 8). In an earlier study,  
335 we proposed that Gp5.7 acts as a ‘last line of defense’ molecule to prevent aberrant  
336 transcription of middle and late T7 genes by host RNAP molecules that may have  
337 escaped inhibition by Gp2 (8). The present study has uncovered additional biological  
338 roles for Gp5.7 in the T7 development cycle. The new biological roles for Gp5.7 in  
339 the T7 developmental cycle uncovered in the present study are summarized in the  
340 model in Fig. 5, which is partly supported by experimental evidence but also based on  
341 several assumptions (e.g. the differences in the intracellular levels of phage proteins  
342 and  $\sigma$  factors) that may not hold up as more evidence emerges. The results from the *in*  
343 *vitro* experiments presented here, infer that during infection of exponentially growing  
344 *E. coli* cells by T7 phage, Gp5.7 serves to inhibit transcription initiation from T7 A1-3  
345 promoters by  $E\sigma^S$  (Fig. 1C), which accumulates (Fig. 1B), possibly as a consequence  
346 of the (p)ppGpp-mediated stress response mechanism (Fig. 1A) to T7 infection (Fig.  
347 5, box 1-3). Gp5.7 is also required for T7 development in *E. coli* in the stationary  
348 phase of growth (Fig. 5, box 4-6). In this case, we envisage that Gp5.7 will be absent  
349 when the transcription (of early T7 genes) dependent translocation of the T7 genome

350 by  $E\sigma^S$  occurs during infection of *E. coli* in the stationary phase of growth (Fig. 5, box  
351 4), but becomes available when the  $E\sigma^S$  is no longer required, i.e. when the T7 RNAP  
352 takes over the transcription of the middle and late genes (Fig. 5, box 5). The fact that  
353 Gp2 only poorly inhibits  $E\sigma^S$  (7) further supports the need for Gp5.7 for T7  
354 development in both exponentially growing and stationary phase *E. coli* cells. Thus,  
355 to the best of our knowledge, Gp5.7 is the only phage-encoded host RNAP inhibitor  
356 (or phage factor) described to date that is required for successful phage development  
357 in stationary phase bacteria. Intriguingly, we are unable to ‘rescue’ the T7  $\Delta gp5.7$   
358 phage in a  $\Delta rpoS$  *E. coli* strain in the context of the plaque-enlargement assay shown  
359 in Fig. 4. As shown in Fig. S5, wild-type and  $\Delta gp5.7$  T7 phages are equally  
360 compromised to efficiently develop in the  $\Delta rpoS$  *E. coli* strain. However, based on the  
361 assumption that the intracellular levels of  $E\sigma^{70}$  will be higher in the  $\Delta rpoS$  *E. coli* than  
362 in the wild-type *E. coli* due to the absence of the competing  $\sigma^S$  (21), we propose that  
363 T7 is unable to efficiently develop in the  $\Delta rpoS$  *E. coli* because of inadequate ability  
364 of Gp2 and Gp5.7 (and Gp0.7) to inhibit the excess  $E\sigma^{70}$  molecules (which will  
365 presumably dilute the intracellular pool of Gp2 and Gp5.7 (and Gp0.7) available to  
366 fully inhibit  $E\sigma^{70}$  to allow optimal T7 development). Overall, our results indicate that,  
367 although T7 development in *E. coli* depends on the host RNAP (for transcription-  
368 dependent translocation of T7 genome into the bacterial cell and transcription of early  
369 T7 genes), efficient management of host RNAP activity is clearly obligatory for T7 to  
370 optimally develop both in exponentially growing and stationary phase *E. coli* cells.  
371 Consequently, any perturbations in RNAP levels or activity can have adverse effects  
372 on T7 development.

373 We further note that, although Gp2 and Gp5.7 bind to sites located at different  
374 faces of the RNAP (with respect to the active center of the RNAP, the Gp2 binding

375 site is located on the  $\beta'$  jaw domain at the downstream face of the RNAP (10),  
376 whereas Gp5.7 binding site is located at the upstream face of the RNAP (this study)),  
377 both T7 proteins seem to inhibit  $RP_o$  formation by misappropriation of essential  
378 domains of the  $\sigma$  factor (region 1 of  $\sigma^{70}$  in case of Gp2 (7) (22) and R4 of  $\sigma^S$  in the  
379 case of Gp5.7 (this study)). Since the R4 domain of  $\sigma^{70}$  is also targeted by a T4 phage  
380 protein, called AsiA, to 'recruit' the host RNAP to transcribe phage genes (reviewed  
381 in (23)), it is interesting to speculate whether phages, regardless of their dependence  
382 on the host RNAP (unlike T7 phage, the T4 phage fully relies on the host RNAP for  
383 the transcription of its genes), have evolved to misappropriate essential bacterial  $\sigma$   
384 factor domains to inhibit (e.g. T7) or redirect (e.g. T4) host RNAP activity to serve  
385 phage developmental requirements.

386 This study unambiguously shows that (p)ppGpp accumulates in T7 infected *E.*  
387 *coli* cells. The involvement of (p)ppGpp in phage development has been previously  
388 documented: For example, (p)ppGpp is required for the replication of phage Mu in *E.*  
389 *coli* ((24)) and in phage lambda it contributes to the switching between the lytic and  
390 lysogenic cycles (25). However, the role of (p)ppGpp in T7 development and the  
391 signaling pathway(s) that results in its synthesis are unknown. In *E. coli* two different  
392 pathways are involved in the production of (p)ppGpp: the RelA- and SpoT-dependent  
393 pathways (reviewed in (26)). RelA is associated with ribosomes and produces  
394 (p)ppGpp in response to uncharged tRNA in the ribosomal A-site during amino acid  
395 starvation. In contrast, SpoT is primarily responsible for the accumulation of  
396 (p)ppGpp in response to most stresses (e.g. fatty acid or iron starvation) and nutrient  
397 limitations (e.g. carbon starvation) apart from amino acid starvation. However, it  
398 seems paradoxical that T7 infected *E. coli* cells experience amino acid starvation  
399 since cellular translation becomes increased during T7 development (to serve phage



400 gene expression needs) through the phosphorylation of translation elongation factors  
401 G, F and the ribosomal protein S6 (27). Although this study describes a strategy T7  
402 uses to mitigate the effect of accumulation of (p)ppGpp during T7 development in *E.*  
403 *coli*, clearly, the role of (p)ppGpp in T7 development and the signaling pathway(s)  
404 that induce its synthesis warrant further investigation.

405 In summary, our study has uncovered a new aspect of T7 biology and the  
406 distinct strategies used by this phage to shut down bacterial RNAP for an optimal  
407 infection outcome in *E. coli* in exponentially growing and stationary phase of growth.  
408 The latter is clearly relevant to bacteria encountered by T7 in the natural environment,  
409 which are often in a starved and thus in a growth-attenuated or slow growing state.  
410 Therefore, the insights from this study also have implications on the emerging interest  
411 in the use of phages, phage-derived antibacterial compounds and their bacterial  
412 targets to treat bacterial infections where bacteria largely exist in a ‘stressed’ state and  
413 mostly depend on  $E\sigma^S$  dependent gene expression for survival (28).

414

415

416

417

418

419

420

421

422

423

424

425 **Material and Methods.**

426 **(p)ppGpp measurements.** A culture of *E. coli* MG1655 *rpoC*-FLAG was setup from  
427 an overnight culture in 5 ml potassium morpholinopropane sulfonate (MOPS)  
428 minimal media with a starting OD<sub>600</sub> of 0.05 at 37°C. At OD<sub>600</sub> 0.1, 20 µCi/ml [<sup>32</sup>P]  
429 H<sub>3</sub>PO<sub>4</sub> was added as phosphate source and the culture was left to grow to an OD<sub>600</sub> of  
430 0.45. The culture was then infected with T7 wild-type (ratio of 10:1 – T7:*E. coli*) in  
431 the presence of 1 mM CaCl<sub>2</sub>. To detect (p)ppGpp production, 500 µl of the cultures  
432 prior to infection (time 0) and at 10 min after infection were added to 100 µl of ice  
433 cold 2 M formic acid and incubated on ice for 30 min. The samples were then  
434 centrifuged for 5 min at 17,000xg and 10 µl of supernatant were spotted on thin layer  
435 chromatography (TLC) polyethylenimine (PEI) cellulose F (dimensions 20 cm x 20  
436 cm [Merck Millipore]). The spot was left to migrate to the top of the sheet in a TLC  
437 tank in presence of 1.5 M KH<sub>2</sub>PO<sub>4</sub> pH 3.6, dried before exposing overnight onto  
438 phosphor screen and viewed using Phosphoimager. For a positive control, 100 µg/ml  
439 of serine hydroxamate (SHX) was added to MG1655 *rpoC*-FLAG at OD<sub>600</sub> of 0.45 and  
440 sample taken after 10 min and processed as above.

441

442 **Western blotting.** *E. coli* MG1655 *rpoC*-FLAG strain was grown in LB at 30°C to an  
443 OD<sub>600</sub> of ~0.45. The culture was then infected with T7 wild-type (ratio of 0.1:1 –  
444 T7:*E. coli*) in the presence of 1 mM CaCl<sub>2</sub>. To detect σ<sup>S</sup> production, 20 ml of the  
445 culture prior to infection (time 0) and at 10 min intervals after infection were taken  
446 until complete lysis was obtained. Experiments with the MG1655 Δ*relA*/Δ*spoT* strain  
447 ((29); kindly provided by Kenn Gerdes) were conducted exactly as described above  
448 but samples were taken at 0 and 40 min after T7 infection. Cultures were centrifuged,  
449 cell pellets re-suspended in 500 µl of 20 mM Na<sub>2</sub>PO<sub>4</sub>, 50 mM NaCl and 5% glycerol

450 and sonicated. The cleared cell lysate was then loaded on 4-20% SDS-PAGE and ran  
451 at 200 V for 30 min. The SDS-PAGE gel was transferred onto polyvinylidene  
452 difluoride (PVDF) membrane (0.2  $\mu\text{m}$ ) using Trans-Blot® Turbo™ Transfer System  
453 [Bio-Rad] device and processed according to standard molecular biology protocols.  
454 The primary antibodies were used at the following titres: anti-*E. coli* RNAP  $\sigma^S$   
455 antibody at 1:500 [1RS1 – Biolegend], anti-*E. coli* RNAP  $\alpha$ -subunit antibody at  
456 1:1000 [4AR2 – Biolegend]. The secondary antibody Rabbit Anti-Mouse IgG H&L  
457 (HRP) was used at 1:2500 [ab97046—Abcam]. Bands were detected using an  
458 Amersham ECL Western Blotting Detection Reagent [GE Healthcare Life Sciences]  
459 and analysed on a Chemidoc using the Image Lab Software.

460

461 **Protein expression and purification.** FLAG-tagged *E. coli*  $\sigma^{70}$  and  $\sigma^S$  were PCR  
462 amplified from *E. coli* genome and cloned into the pT7-FLAG™-1 vector [Sigma-  
463 Aldrich]. Recombinant vectors pT7-FLAG::*rpoD* and pT7-FLAG::*rpoS* were  
464 confirmed by DNA sequencing. For the biochemical experiments, recombinant  
465 FLAG-tagged *E. coli*  $\sigma^{70}$  and  $\sigma^S$  were made by FLAG affinity purification from *E. coli*  
466 strain BL21 (DE3). Briefly, the culture of BL21 (DE3) cells containing pT7-  
467 FLAG::*rpoD* was grown at 37°C to an OD<sub>600</sub> of  $\approx 0.4$ , cold shocked on ice for 15 min  
468 before protein expression was induced with 0.1 mM IPTG. The cells were left to grow  
469 at 16°C overnight before harvesting. For FLAG-tagged *E. coli*  $\sigma^S$  expression, BL21  
470 (DE3) containing pT7-FLAG::*rpoS* were grown at 37°C to an OD<sub>600</sub> of  $\approx 0.4$  and  
471 protein expression was induced with 0.1 mM IPTG. The cells were left to continue  
472 growing at 37°C for 3 h before harvesting. The cell pellets for both FLAG-tagged *E.*  
473 *coli*  $\sigma^{70}$  and  $\sigma^S$  were re-suspended in binding buffer (50 mM Tris-HCl, 150 mM NaCl,  
474 pH 7.4) containing cocktail of protease inhibitors and lysed by sonication. The cleared

475 cell lysate was loaded to a column containing anti-FLAG M2 affinity gel [Sigma-  
476 Aldrich] and the purified proteins were obtained by adding elution buffer (100  $\mu\text{g}/\text{ml}$   
477 3XFLAG<sup>®</sup> peptide [Sigma-Aldrich] in binding buffer) for 30 min at 4°C. The purified  
478 proteins were dialyzed into storage buffer (10 mM Tris-HCl pH 8.0, 50 mM NaCl,  
479 50% glycerol, 0.1 mM EDTA and 1 mM DTT) and stored in aliquots at -80°C. The  
480 FLAG-tagged  $\sigma^S\Delta R4$  (amino acid residues 1-262) was made by introducing a stop  
481 codon into pT7-FLAG::*rpoS* by site-directed mutagenesis and its expression and  
482 purification was done as described for the full-length protein. The 6xHis- $\sigma^S R4$  (amino  
483 acid residues 245-330) was amplified from *E. coli* genomic DNA by Gibson assembly  
484 and ligated into the pET-46 Ek/LIC vector [Merck Millipore] and expressed in *E. coli*  
485 strain BL21 (DE3) for the pull-down experiments and structural studies. The cells  
486 were grown in either LB (for pull-down experiments) or M9 Minimal medium  
487 labelled with <sup>15</sup>N and <sup>13</sup>C (for the structural studies) and induced with 0.5 mM IPTG  
488 when the OD<sub>600</sub> reached 0.6 and incubated overnight at 18°C before harvesting by  
489 centrifugation. The cells were lysed by sonication in 50 mM NaH<sub>2</sub>PO<sub>4</sub>, 300 mM  
490 NaCl, 10 mM imidazole pH 8 and purified using Ni-NTA beads [Qiagen]. The eluate  
491 was then dialyzed against 50 mM NaH<sub>2</sub>PO<sub>4</sub> and 350 mM NaCl, at pH 6 and  
492 subsequently concentrated down for NMR experiments whilst for pull-down  
493 experiments, the 6xHis- $\sigma^S R4$  protein was kept in 50 mM NaH<sub>2</sub>PO<sub>4</sub>, 300 mM NaCl,  
494 and 10 mM imidazole pH 8. The 6xHis- $\sigma^S$  was amplified from *E. coli* genomic DNA,  
495 cloned into pET-46 Ek/LIC vector [Merck Millipore] by Gibson assembly, expressed  
496 and purified as described for 6xHis- $\sigma^S R4$ . The cells were lysed by sonication under  
497 denaturing condition containing 8M urea, purified with Ni-NTA beads under  
498 denaturing conditions and the denatured 6xHis- $\sigma^S$  was refolded in 50 mM NaH<sub>2</sub>PO<sub>4</sub>,  
499 300 mM NaCl, and 10 mM imidazole pH 8. The 6xHis-Gp5.7 was amplified from

500 pBAD18::*gp5.7* (8) and cloned into pET-46 plasmid. The Histidine tag on Gp5.7 was  
501 deleted to express tag-free Gp5.7 using Q5 site directed mutagenesis kit [NEB]. The  
502 protein was expressed under the same condition as 6xHis- $\sigma^S$ R4. Recombinant 6xHis-  
503 Gp5.7 and 6xHis-Gp2 expression and purification were done exactly as previously  
504 described (8, 10). Sequences of all oligonucleotides used in the construction of the  
505 expression vectors are available upon request.

506

507 ***In vitro* transcription assays.** These were conducted exactly as previously described  
508 (8) in 10 mM Tris pH 7.9, 40 mM KCl, 10 mM MgCl<sub>2</sub> using *E. coli* core RNAP from  
509 NEB and FLAG-tagged versions of  $\sigma^{70}$  and  $\sigma^S$  were purified exactly as described  
510 above. Reactions in Fig. 3C and 3D were conducted in 100 mM K-glutamate, 40 mM  
511 HEPES pH 8, 10 mM MgCl<sub>2</sub> and 100  $\mu$ g/ml BSA. In all reactions Gp5.7 or Gp2 was  
512 pre-incubated with E $\sigma^S$  or E $\sigma^{70}$  at the indicated concentrations before adding promoter  
513 DNA to the reaction. However, in the reactions shown in Fig. 3D, Gp5.7 was added to  
514 the pre-formed RP<sub>O</sub> (i.e. following pre-incubation of E $\sigma^S$  and the promoter DNA).  
515 Sequences of all oligonucleotides used to generate promoter probes are available in  
516 (8) or upon request.

517

518 **Pull-down assays.** For the pull-down assays shown in Fig. 2A and 2B, Ni-NTA beads  
519 [Qiagen] were used. Approximately 0.02 mg of recombinant 6xHis- $\sigma^S$  or 6xHis- $\sigma^S$ R4  
520 in binding buffer (50 mM NaH<sub>2</sub>PO<sub>4</sub>, 300 mM NaCl, and 10 mM imidazole pH 8) was  
521 added to beads and incubated at 4°C for 30 min. *E. coli* whole-cell lysate containing  
522 overexpressed untagged Gp5.7 was added to resin containing sigma and incubated for  
523 1 h at 4°C. The beads were washed three times in 1 ml wash buffer (50 mM  
524 NaH<sub>2</sub>PO<sub>4</sub>, 300 mM NaCl, and 20 mM imidazole pH 8) for 10 min to remove any non-

525 specific protein–protein interaction. To elute samples from beads, elution buffer  
526 containing 250 mM imidazole was added. For FLAG-tag protein pull-down assay  
527 (Fig. 2C), 0.02 mg FLAG- $\sigma^S\Delta R4$  was incubated with anti-FLAG M2 affinity gel  
528 [Sigma-Aldrich] in 50 mM Tris HCl, pH 7.4, 150 mM NaCl, 1 mM EDTA at 4°C for  
529 2 h. *E. coli* whole-cell lysate containing overexpressed untagged Gp5.7 was added to  
530 resin containing sigma and incubated for 2 h at 4°C. The beads were washed three  
531 times in 50 mM Tris HCl, pH 7.4, 150 mM NaCl, 1 mM EDTA and 1% Triton X-100  
532 for 10 min to remove any non-specific protein–protein interaction. To elute samples  
533 from beads, elution buffer containing 100  $\mu\text{g/ml}$  3XFLAG<sup>®</sup> peptide [Sigma-Aldrich]  
534 was added. Ten microliters of samples together with Laemmli 2x concentrate SDS  
535 Sample Buffer was loaded on a 10–15% SDS-PAGE alongside Protein standard  
536 Marker and stained with Coomassie Brilliant Blue.

537

538 **NMR structure determination.** NMR spectra were collected at 310K on Bruker  
539 DRX600 and DRX800 spectrometers equipped with cryo-probes. Spectral  
540 assignments were completed using our in-house, semi-automated assignment  
541 algorithms and standard triple-resonance assignment methodology (30).  $H_\alpha$  and  $H_\beta$   
542 assignments were obtained using HBHA (CBCACO)NH and the full side-chain  
543 assignments were extended using HCCH-total correlation (TOCSY) spectroscopy and  
544 (H)CC(CO)NH TOCSY. Three-dimensional  $^1\text{H}$ - $^{15}\text{N}$ / $^{13}\text{C}$  NOESY-HSQC (mixing time  
545 100 ms at 800 MHz) experiments provided the distance restraints used in the final  
546 structure calculation (31). The ARIA protocol was used for completion of the NOE  
547 assignment and structure calculation. The frequency window tolerance for assigning  
548 NOEs was  $\pm 0.025$  ppm and  $\pm 0.03$  ppm for direct and indirect proton dimensions and  
549  $\pm 0.6$  ppm for both nitrogen and carbon dimensions. The ARIA parameters p, Tv and

550 Nv were set to default values. 108 dihedral angle restraints derived from TALOS+  
551 were also implemented. The 10 lowest energy structures had no NOE violations  
552 greater than 0.5 Å and dihedral angle violations greater than 5°. The structural  
553 statistics are shown in Supplementary Table 1.

554

555 **NMR titration.** Unlabelled Gp5.7 was added to <sup>15</sup>N labelled 6xHis-σ<sup>S</sup>R4 according  
556 to stoichiometric ratio to perform NMR titration. Maximum five-fold Gp5.7 was  
557 added to 6xHisσ<sup>S</sup>R4 in order to broad out the entire spectra.

558

559 **Electrophoretic mobility shift assays.** These were conducted exactly as previously  
560 described to distinguish between initial promoter complex and RP<sub>O</sub> formation (10).  
561 Briefly, 75 nM of *E. coli* core RNAP (NEB) was incubated with 300 nM σ<sup>S</sup> or σ<sup>S</sup>ΔR4  
562 either on ice (to monitor initial promoter complex formation) or at 37°C (to monitor  
563 RP<sub>O</sub> formation) for 5 min in 100 mM K-glutamate, 40 mM HEPES pH 8, 10 mM  
564 MgCl<sub>2</sub> and 100 μg/ml BSA. Twenty nanomolar of <sup>32</sup>P-labelled T7 A1p was added and  
565 incubated for 5 min. Since initial T7 A1 promoter complexes (formed at temperatures  
566 < 4 °C) are sensitive to heparin and, conversely, RP<sub>O</sub> (formed at 37°C) are resistant to  
567 heparin (32), the reactions were challenged with 100 μg/ml heparin before separating  
568 the RNAP bound and free promoter DNA by native gel electrophoresis on a 4.5%  
569 (w/v) native polyacrylamide gel run at 100 V for 100 min at 4°C (to monitor initial  
570 promoter complex formation) or for 60 min at room temperature (to monitor RP<sub>O</sub>  
571 formation). The dried gel was then analyzed by autoradiography.

572

573 **Plaque-enlargement assay.** T7 phage plaques were formed as described in (8). To  
574 obtain images of plaques, *E. coli* MG1655 cultures and MG1655 Δ*relA*/Δ*spoT* were

575 grown to an OD<sub>600</sub> of 0.45 in LB at 30°C and 300 µl aliquots of the culture were taken  
576 out and either T7 wild-type or T7  $\Delta gp5.7$  lysate (sufficient to produce ~ 10 plaques)  
577 were added together with 1 mM CaCl<sub>2</sub> and incubated at 37°C for 10 min to allow the  
578 phage to adsorb to the bacteria. Three milliliters of 0.7% (w/v) top agar was added to  
579 each sample and plated onto plates containing exactly 20 ml of 1.5% (w/v) LB agar.  
580 The plates were then put in a Epson perfection V370 photo scanner [Model J232D]  
581 inside a 30°C incubator and images of the plates were taken every two hours over a  
582 72 h period for analysis. For complementation experiments, *E. coli* MG1655 cells  
583 containing either pBAD18::empty or pBAD18::*gp5.7* or pBAD18::*gp5.7-L42A* (8)  
584 were used and the plaque-enlargement assay was carried out as above on plates  
585 containing 100 µg/ml ampicillin and 0.04% (w/v) L-arabinose to induce *gp5.7*  
586 expression. The MG1655  $\Delta rpoS$  strain was obtained by phage transduction from  
587 *ArpoS* mutant in Keio library (33).

588

589

590

591 **ACKNOWLEDGMENTS.** We would like to thank Daniel Brown for help with the  
592 (p)ppGpp measurements. This work was supported by Wellcome Trust awards to SM  
593 (Investigator Award 100280 and multiuser equipment grant 104833) and SW  
594 (Investigator Award 100958).

595

596

597

598

599



600 **References.**

- 601 1. De Smet J, Hendrix H, Blasdel BG, Danis-Wlodarczyk K, & Lavigne R  
602 (2017) Pseudomonas predators: understanding and exploiting phage-  
603 host interactions. *Nat Rev Microbiol* 15(9):517-530.
- 604 2. Nechaev S & Severinov K (2008) The elusive object of desire--interactions  
605 of bacteriophages and their hosts. *Curr Opin Microbiol* 11(2):186-193.
- 606 3. Nechaev S & Severinov K (2003) Bacteriophage-induced modifications of  
607 host RNA polymerase. *Annu Rev Microbiol* 57:301-322.
- 608 4. Kemp P, Gupta M, & Molineux IJ (2004) Bacteriophage T7 DNA ejection  
609 into cells is initiated by an enzyme-like mechanism. *Mol Microbiol*  
610 53(4):1251-1265.
- 611 5. Savalia D, Robins W, Nechaev S, Molineux I, & Severinov K (2010) The role  
612 of the T7 Gp2 inhibitor of host RNA polymerase in phage development. *J*  
613 *Mol Biol* 402(1):118-126.
- 614 6. Severinova E & Severinov K (2006) Localization of the Escherichia coli  
615 RNA polymerase beta' subunit residue phosphorylated by bacteriophage  
616 T7 kinase Gp0.7. *J Bacteriol* 188(10):3470-3476.
- 617 7. James E, *et al.* (2012) Structural and mechanistic basis for the inhibition  
618 of Escherichia coli RNA polymerase by T7 Gp2. *Mol Cell* 47(5):755-766.
- 619 8. Tabib-Salazar A, *et al.* (2017) Full shut-off of Escherichia coli RNA-  
620 polymerase by T7 phage requires a small phage-encoded DNA-binding  
621 protein. *Nucleic Acids Res* 45(13):7697-7707.
- 622 9. Friesen JD & Fiil N (1973) Accumulation of guanosine tetraphosphate in  
623 T7 bacteriophage-infected Escherichia coli. *J Bacteriol* 113(2):697-703.
- 624 10. Camara B, *et al.* (2010) T7 phage protein Gp2 inhibits the Escherichia coli  
625 RNA polymerase by antagonizing stable DNA strand separation near the  
626 transcription start site. *Proc Natl Acad Sci U S A* 107(5):2247-2252.
- 627 11. Liu B, Zuo Y, & Steitz TA (2016) Structures of E. coli sigmaS-transcription  
628 initiation complexes provide new insights into polymerase mechanism.  
629 *Proc Natl Acad Sci U S A* 113(15):4051-4056.
- 630 12. Chen H, Tang H, & Ebright RH (2003) Functional interaction between RNA  
631 polymerase alpha subunit C-terminal domain and sigma70 in UP-  
632 element- and activator-dependent transcription. *Mol Cell* 11(6):1621-  
633 1633.
- 634 13. Ross W, Schneider DA, Paul BJ, Mertens A, & Gourse RL (2003) An  
635 intersubunit contact stimulating transcription initiation by E coli RNA  
636 polymerase: interaction of the alpha C-terminal domain and sigma region  
637 4. *Genes Dev* 17(10):1293-1307.
- 638 14. Minakhin L & Severinov K (2003) On the role of the Escherichia coli RNA  
639 polymerase sigma 70 region 4.2 and alpha-subunit C-terminal domains in  
640 promoter complex formation on the extended -10 galP1 promoter. *J Biol*  
641 *Chem* 278(32):29710-29718.
- 642 15. Sclavi B, *et al.* (2005) Real-time characterization of intermediates in the  
643 pathway to open complex formation by Escherichia coli RNA polymerase  
644 at the T7A1 promoter. *Proc Natl Acad Sci U S A* 102(13):4706-4711.
- 645 16. Zuo Y & Steitz TA (2015) Crystal structures of the E. coli transcription  
646 initiation complexes with a complete bubble. *Mol Cell* 58(3):534-540.

- 647 17. Dominguez C, Boelens R, & Bonvin AM (2003) HADDOCK: a protein-  
648 protein docking approach based on biochemical or biophysical  
649 information. *J Am Chem Soc* 125(7):1731-1737.
- 650 18. Battesti A, Majdalani N, & Gottesman S (2011) The RpoS-mediated  
651 general stress response in Escherichia coli. *Annu Rev Microbiol* 65:189-  
652 213.
- 653 19. Nowicki D, Kobiela W, Wegrzyn A, Wegrzyn G, & Szalewska-Palasz A  
654 (2013) ppGpp-dependent negative control of DNA replication of Shiga  
655 toxin-converting bacteriophages in Escherichia coli. *J Bacteriol*  
656 195(22):5007-5015.
- 657 20. Yin J (1993) Evolution of bacteriophage T7 in a growing plaque. *J*  
658 *Bacteriol* 175(5):1272-1277.
- 659 21. Farewell A, Kvint K, & Nystrom T (1998) Negative regulation by RpoS: a  
660 case of sigma factor competition. *Mol Microbiol* 29(4):1039-1051.
- 661 22. Bae B, *et al.* (2013) Phage T7 Gp2 inhibition of Escherichia coli RNA  
662 polymerase involves misappropriation of sigma70 domain 1.1. *Proc Natl*  
663 *Acad Sci U S A* 110(49):19772-19777.
- 664 23. Hinton DM (2010) Transcriptional control in the prereplicative phase of  
665 T4 development. *Virology* 407(2):289.
- 666 24. North SH, Kirtland SE, & Nakai H (2007) Translation factor IF2 at the  
667 interface of transposition and replication by the PriA-PriC pathway. *Mol*  
668 *Microbiol* 66(6):1566-1578.
- 669 25. Slominska M, Neubauer P, & Wegrzyn G (1999) Regulation of  
670 bacteriophage lambda development by guanosine 5'-diphosphate-3'-  
671 diphosphate. *Virology* 262(2):431-441.
- 672 26. Haurlyuk V, Atkinson GC, Murakami KS, Tenson T, & Gerdes K (2015)  
673 Recent functional insights into the role of (p)ppGpp in bacterial  
674 physiology. *Nat Rev Microbiol* 13(5):298-309.
- 675 27. Robertson ES, Aggison LA, & Nicholson AW (1994) Phosphorylation of  
676 elongation factor G and ribosomal protein S6 in bacteriophage T7-  
677 infected Escherichia coli. *Mol Microbiol* 11(6):1045-1057.
- 678 28. Dong T & Schellhorn HE (2010) Role of RpoS in virulence of pathogens.  
679 *Infect Immun* 78(3):887-897.
- 680 29. Magnusson LU, Gummesson B, Joksimovic P, Farewell A, & Nystrom T  
681 (2007) Identical, independent, and opposing roles of ppGpp and DksA in  
682 Escherichia coli. *J Bacteriol* 189(14):5193-5202.
- 683 30. Marchant J, Sawmynaden K, Saouros S, Simpson P, & Matthews S (2008)  
684 Complete resonance assignment of the first and second apple domains of  
685 MIC4 from Toxoplasma gondii, using a new NMRView-based assignment  
686 aid. *Biomol NMR Assign* 2(2):119-121.
- 687 31. Pardi A (1995) Multidimensional heteronuclear NMR experiments for  
688 structure determination of isotopically labeled RNA. *Methods Enzymol*  
689 261:350-380.
- 690 32. Schickor P, Metzger W, Werel W, Lederer H, & Heumann H (1990)  
691 Topography of intermediates in transcription initiation of E.coli. *EMBO J*  
692 9(7):2215-2220.
- 693 33. Baba T, *et al.* (2006) Construction of Escherichia coli K-12 in-frame,  
694 single-gene knockout mutants: the Keio collection. *Mol Syst Biol* 2:2006  
695 0008.

696 **Figure Legends.**

697 **Fig. 1. Gp5.7 is an inhibitor of the *E. coli* stationary phase RNAP,  $E\sigma^S$ .** (A) PEI  
698 cellulose showing (p)ppGpp production during T7 infection. Lane 1: before T7  
699 infection, lane 2: 10 min after infection with T7 and lane 3: positive control showing  
700 (p)ppGpp production in response to addition of sodium hydroxamate (SHX). The  
701 migration positions of ppGpp and (p)ppGpp and the origin where the samples were  
702 spotted are indicated. (B) Expression of  $\sigma^S$  during T7 infection. *Top*: Graph showing  
703 the optical density ( $OD_{600nm}$ ) of wild-type and  $\Delta relA/\Delta spoT$  *E. coli* cultures as a  
704 function of time after infection with T7 phage. *Bottom*: Image of a Western blot  
705 probed with anti- $\sigma^S$  and anti-RNAP  $\alpha$ -subunit (loading control) antibodies. Lanes 1 to  
706 5 contain whole cell extracts of wild-type *E. coli* cells at 0, 10, 20, 30 and 40 min  
707 after infection with T7; lanes 6 and 7 contain whole cell extracts of  $\Delta relA/\Delta spoT$  *E.*  
708 *coli* cells at 0 and 40 min after infection with T7. (C) Autoradiograph of denaturing  
709 gels comparing the ability of  $E\sigma^S$  and  $E\sigma^{70}$  to synthesize a dinucleotide-primed RNA  
710 product from the T7 A1 promoter in the absence and presence of Gp2 and Gp5.7. The  
711 dinucleotide used in the assay is underlined and the asterisks indicate the  
712 radiolabelled nucleotide. The concentration of  $E\sigma^S$  and  $E\sigma^{70}$  was 75 nM and Gp2 and  
713 Gp5.7 were present at 75, 150 and 300 and 1200, 1500 and 1875 nM, respectively.  
714 The percentage of RNA transcript synthesized (%A) in the reactions containing Gp5.7  
715 or Gp2 with respect to reactions with no Gp5.7 or Gp2 added is given at the bottom of  
716 the gel and the value obtained in at least three independent experiments fell within 3–  
717 5% of the %A value shown.

718

719 **Fig. 2. Structural insights into the interaction between R4 domain of  $\sigma^S$  and**  
720 **Gp5.7.** (A) Image of a denaturing gel showing that 6xHis- $\sigma^S$  pulls down

721 overexpressed untagged Gp5.7 from *E. coli* whole cell lysate. The migration positions  
722 of the Gp5.7 and 6xHis- $\sigma^S$  are indicated. **(B)** As in (A), but using 6xHis- $\sigma^S$ R4 domain.  
723 **(C)** As in (A), but using FLAG- $\sigma^S$  $\Delta$ R4. **(D)** *Left*: Cartoon representation of apo- $\sigma^S$ R4  
724 solution structure. *Right*: The image on the left rotated 180° clockwise with the  $\alpha$ -  
725 helices corresponding to R4 sub-regions 4.1 (in green) and 4.2 (in blue) indicated. **(E)**  
726 Overlay of cartoon representations of apo- $\sigma^S$ R4 domain (orange) and bound- $\sigma^S$ R4  
727 domain (cyan). **(F)** Overlay of 2D  $^1\text{H}$ - $^{15}\text{N}$  HSQC spectra of the apo- $\sigma^S$ R4 without  
728 (black) and with Gp5.7 (red) recorded at pH 6.0, 300 K. Peaks that experienced  
729 broadening or chemical shift perturbation are labelled according to the amino acid  
730 residues in  $\sigma^S$ . **(G)** A surface representation of apo- $\sigma^S$ R4 showing the regions  
731 interfacing with Gp5.7 (amino acid residues with significant peak broadening and  
732 chemical shift perturbation are shown in red, while those that experience moderate  
733 peak broadening and chemical shift perturbation are shown in orange and those that  
734 experience weak peak broadening and chemical shift perturbation are shown in  
735 yellow); amino acid residues associated with interacting with or proximal to the  
736 promoter DNA (raspberry) and RNAP subunits (grey) are also shown.

737

738 **Fig. 3. Gp5.7 inhibits  $\text{RP}_O$  formation by  $\text{E}\sigma^S$  on the T7 A1 promoter.** **(A)**

739 Autoradiograph of denaturing gels showing the ability of the  $\text{E}\sigma^S$  $\Delta$ R4 to synthesize a  
740 dinucleotide-primed RNA product from the T7 A1 and *lacUV5* promoters. The  
741 dinucleotide used in the assay is underlined and the asterisks indicate the radiolabeled  
742 nucleotide. **(B)** Autoradiographs of non-denaturing gels showing the ability of  $\text{E}\sigma^S$   
743 and  $\text{E}\sigma^S$  $\Delta$ R4 to form the initial promoter complex (< 4°C) and the  $\text{RP}_O$  (at 37°C) on  
744 the T7 A1 promoter. The migration positions of promoter complexes and free DNA  
745 are indicated. Reactions to which heparin were added are indicated. See methods for

746 details. (C) As in (A) but using the T7 A1 homoduplex and heteroduplex (-12 to +2)  
747 promoters. (D) As in (A) but Gp5.7 (1875 nM) was added to the pre-formed  $RP_O$   
748 (formed using 75 nM  $E\sigma^S$  (see text for details)).

749

750 **Fig. 4. A role for Gp5.7 in managing  $\sigma^S$  during T7 development in stationary**

751 **phase *E. coli*. Top:** Representative scanned images of T7 wild-type and T7  $\Delta gp5.7$

752 plaques formed on a lawn of wild-type *E. coli* and  $\Delta relA/\Delta spoT$  *E. coli* over a 72 h

753 incubation period. *Bottom:* Graph showing plaque size (%P) as percentage of final

754 plaque size formed by T7 wild-type phage on a lawn of wild-type *E. coli* after 72 h of

755 incubation (set at 100%) as a function of incubation time.

756

757 **Fig. 5. Model proposing how the host RNAP is managed during T7 development**

758 **in exponentially growing and stationary phase *E. coli* cells.**

**A**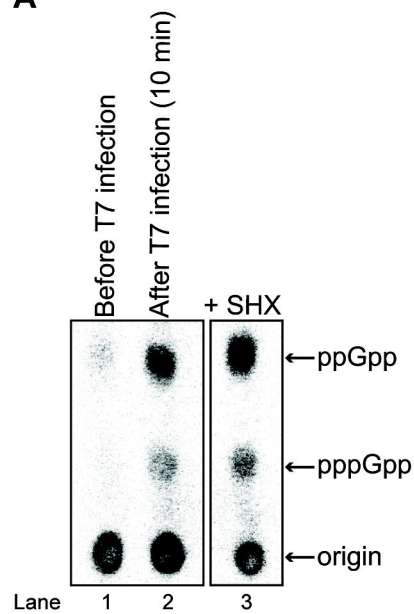**B**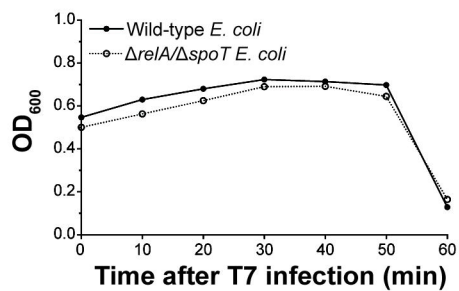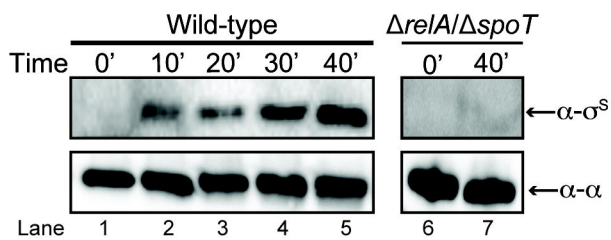**C**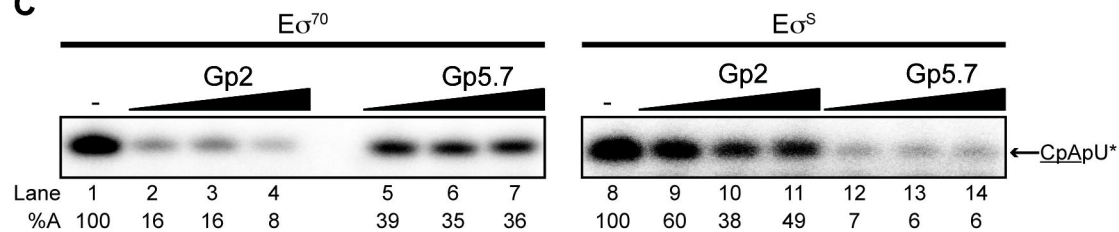

**A**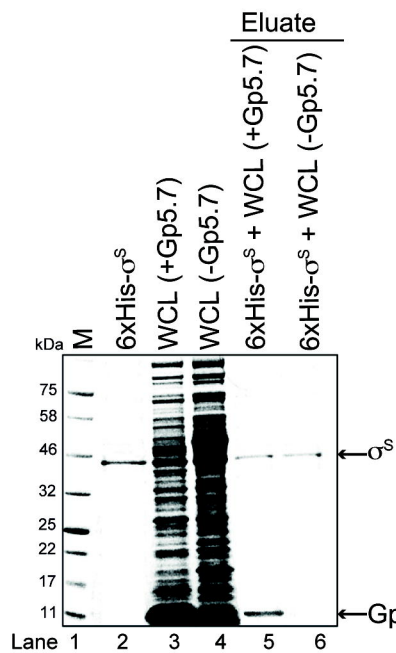**B**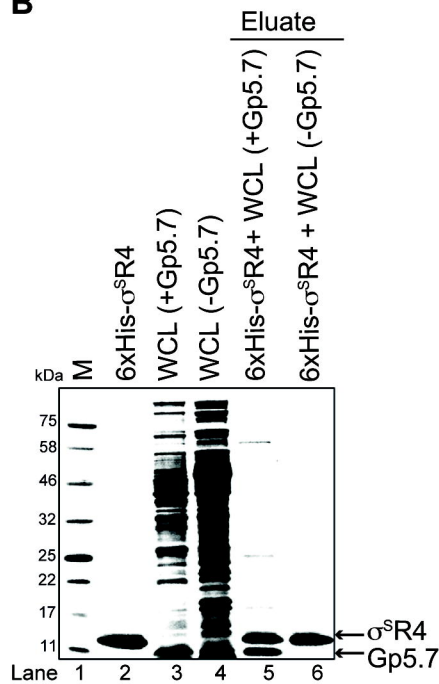**C**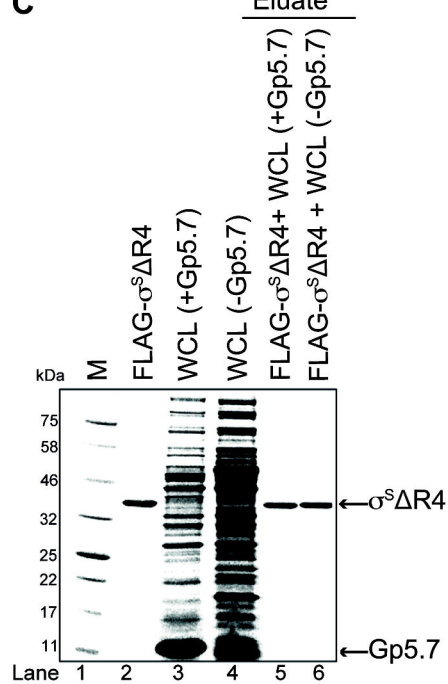**D**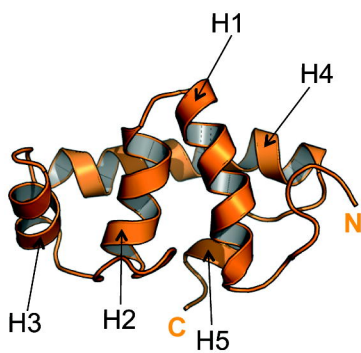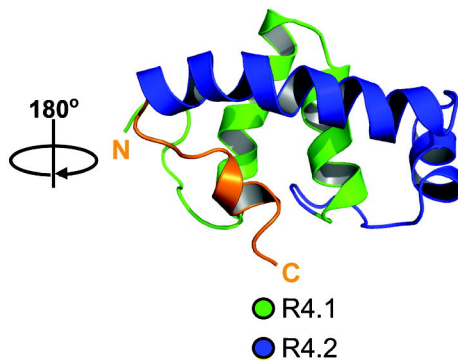**E**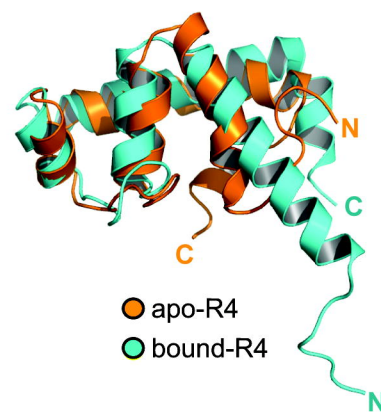**F**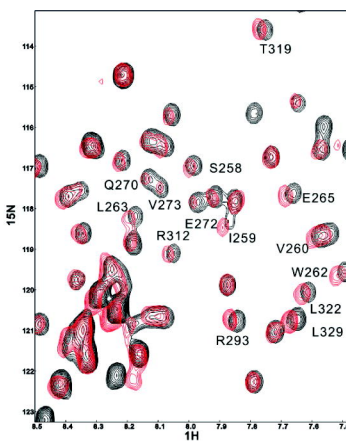**G**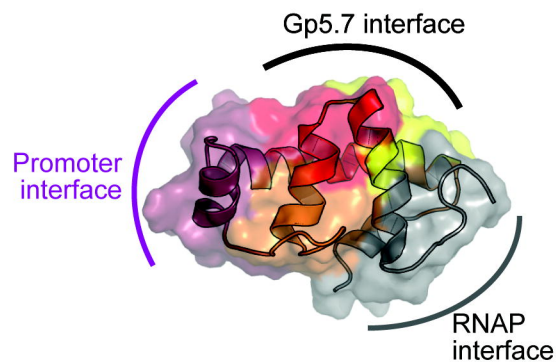

**A**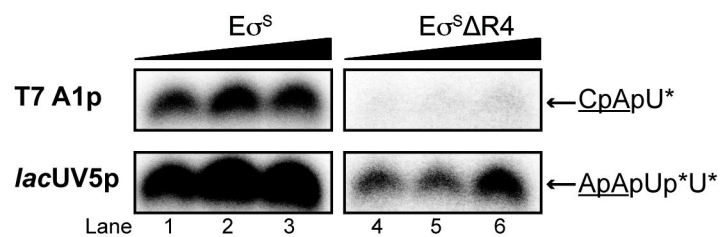**C**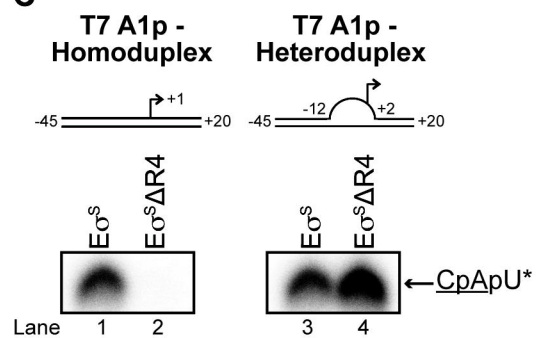**B**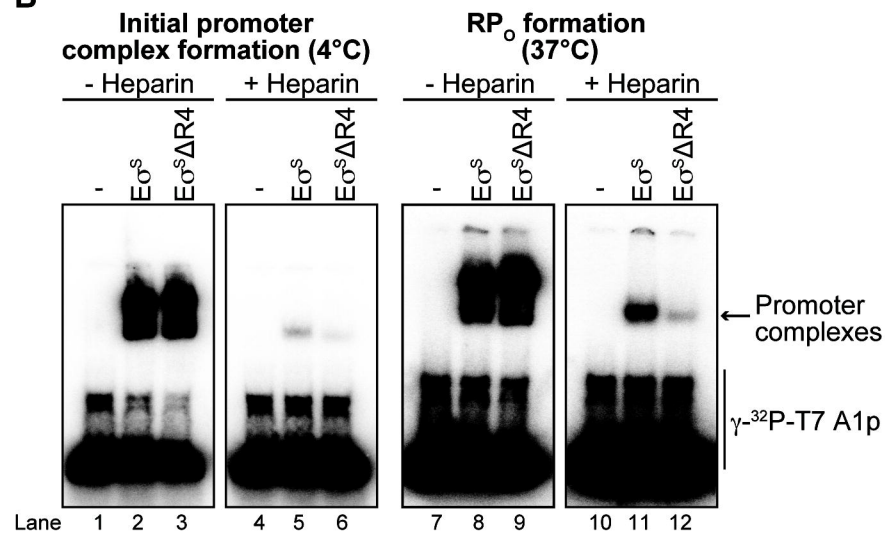**D**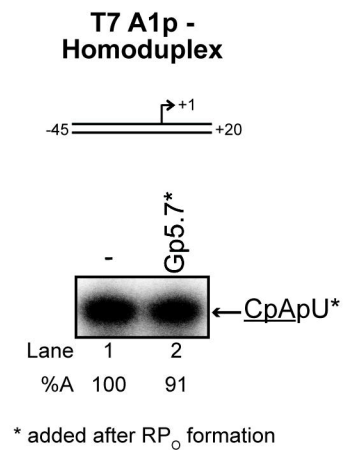



Wild-type *E. coli* +  
T7 wild-type

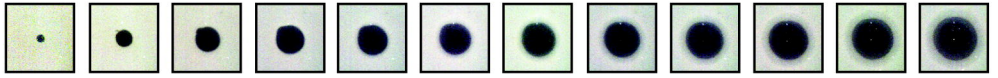

Wild-type *E. coli* +  
T7  $\Delta gp5.7$

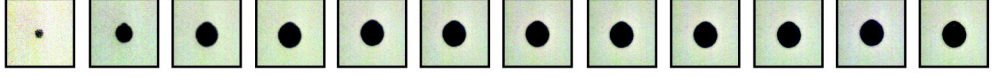

$\Delta relA/\Delta spoT$  *E. coli* +  
T7 wild-type

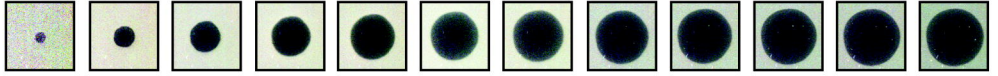

$\Delta relA/\Delta spoT$  *E. coli* +  
T7  $\Delta gp5.7$

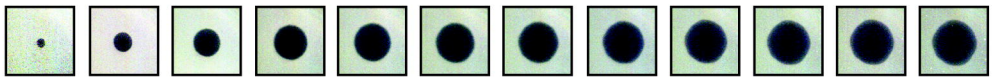

Time (h) 6 12 18 24 30 36 42 48 54 60 66 72

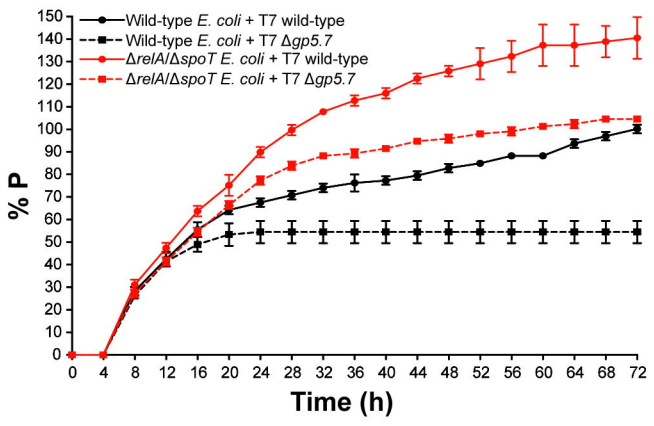

### T7 development in exponentially growing *E. coli*

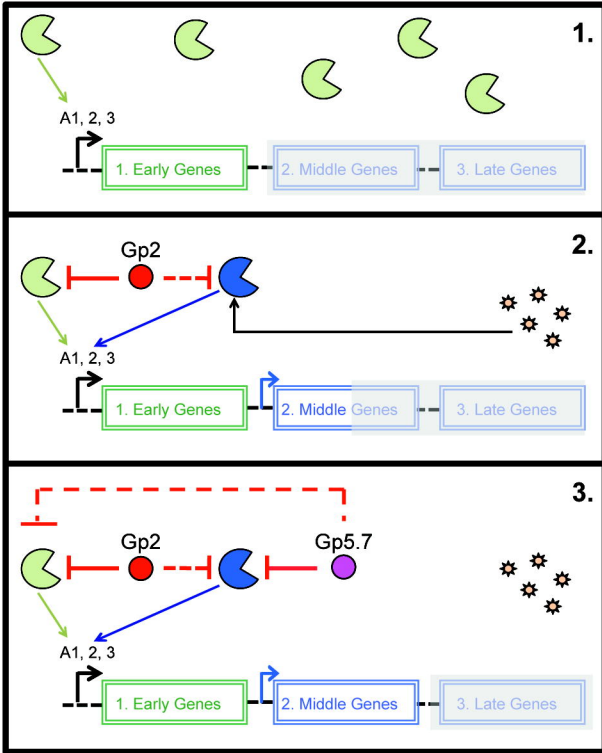

### T7 development in stationary phase *E. coli*

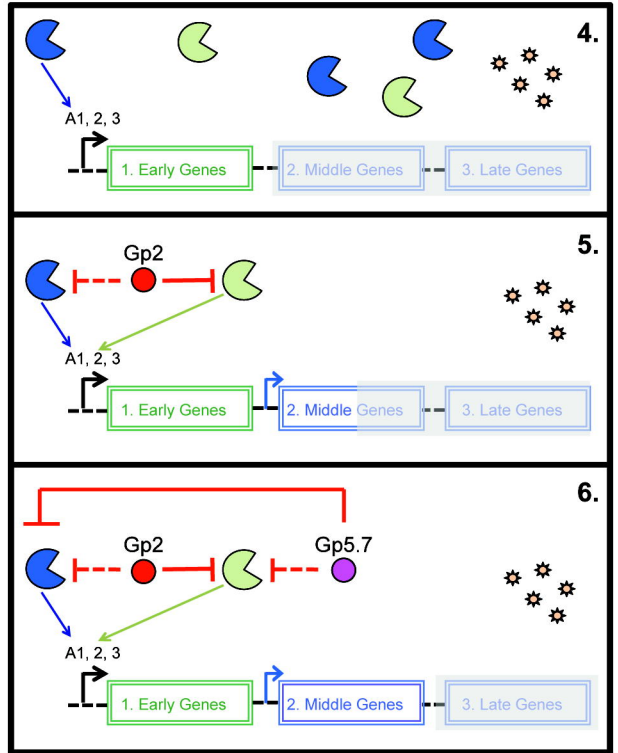

◐  $E\sigma^{70}$    
 ◐  $E\sigma^S$    
 \* (p)ppGpp   
 └ *E. coli* RNAP promoter   
 └ T7 RNAP promoter   
—| Strong inhibition   
- -| Weak inhibition
